# Supplementary material
Source: Royal Society of Chemistry journal article supplement (doi:10.1039/d5ay02066b)
Supplement: d5ay02066b1.xlsx [file d5ay02066b1.xlsx]

## Sheet: Table S1
Supplemental Table S1: Metabolic Equivalent of Tasks. Values associated with the energy expended for a given activity.
Group	Listing in our doc	Activity	MET	Use
House	TV or video	Lying and watching tv	1	1
		sitting and watching tv	1
		Watching a movie in theatures	1
	computer	Light sitting task (computer work)	1.5	1.5
		typing	1.5
Work	Sedentary	Sitting, meetings, light effort	1.5	1.5		from Ainsworth et al, 1993
	Standing Occupation	Treadmill desk/ active workstation	2.3	2.5		from Ainsworth et al, 1993
		directing traffic	2
		hairstylist	1.8
		delivering mail	2.3
		shoe repair	2
		standing tasks (bartending, teaching, clerk,ect.)	3
		flight attendant	3
		cook	2.5
	Manual Labor	Bakery moderate	4	4		from Ainsworth et al, 1993
		Carpentry moderate	4.3
		Maid/Housekeeping	4
		moderate custodial work	3.8
		farming, taking care of animals	4.5
		fishing, moderate	5
		yard work	4
		moderate unskilled labor	4.5
		plumbing	3
	heavy manual labor			7.92857		Average of the occupations listed
		carying medium to heavy loads	8
		coal mining	6
		farming, vigerous effort	8
		fire fighting	12
		Forestry, vigorous	8
		vigerous unskilled labor, construction	5.5
		steel mill	8
Transportation		Driving	2	2		Listed by Besson
		Taking bus	1	1
		Bicycling	8	8
		walking for transporation	3.3	3.3
Sleeping			0.9	0.9
Recreation	Swimming-Competitive		10	10
	Swimming leisurely		6	6
	Backpacking/Mountain Climbing	Backpacking	7	7.5
		Mountain climbing	8
	Walking for pleasure		3.5	3.5
	Racing or rough terrain cycling	Racing	12	10.25
		Mountain climbing	8.5
	Cycling for pleasure	<10 Taylor code biking	4	6
		9.4 mph leisure	6
		10-12 mph leisure	8
	mowing the lawn		5.5	5.5
	watering lawn/garden		1.5	1.5
	digging, shovelling, chopping wood	digging	5	5.66667
		shovelling	6
		chopping wood, moderate	6
	weeding/pruning	weeding	4.5	4.5
	DIY e.g. carpentry, home or car maintenance	general carpentry	3.5	4.375
		auto repair light	3.5
		carpentry outside house	6
		cabinet work	4.5
	High impact aerobics	high aerobic dance	7	8.33333
		general aerobics	6.5
		aerobic 6-8 inch step	8.5
		aerobic 10-12 inch step	10
		calisthenics heavy/vigourous effort	8
		jumping rope	10
	Other types of aerobics	low impact	5	5
	Weight Lifting	Light or moderate effort, general	3	4.5
		Vigorous (Taylor Code)	6
	Conditioning exercise	rowing	7	7
		bike machine	7
	Floor Exercise	yoga	2.5	3
		calisthenics light or moderare, floor	3.5
	Dancing			4.66
		ballet, jazz	4.8
		disco, line dancing, polka, fast	4.5
		general aerobic dance	6.5
		general	4.5
		Slow (waltz, foxtrot, samba, tango, mambo, chacha)	3
	Competitive running			12.5
		6 mph, 10min/mile	10
		6.7 mph, 9min/mile	11
		7 mph, 8.5min/mile	11.5
		7.5 mph, 8min/mile	12.5
		8 mph, 7.5 min/mile	13.5
		8.6 mph, 7 min/mile	14
		9 mph, 6.5 min/mile	15
		10 mph, 6min/mi	16
		cross country	9
	Jogging	general jog	7	7
	bowling, lawn, 10-pin	bowling	3	3
	Tennis/Badminton	Tennis	7	7
		Badminton	7
	Squash/Racquet ball	squash	12	9.66667
		casual racquet ball	7
		racquet ball, competative	10
	Table Tennis		4	4
	Golf		4.5	4.5
	football/soccer/rugby/hockey	football	8	8.6
		soccer	10
		casual soccer	7
		casual hockey	8
		rugby	10
	Cricket		5	5
	Rowing	moderate	7	9		Use the general for rowing
		rowing light	3.5			7.875	Average for rowing
		competetive rowing	12
		general rowing	9
	netball/volleyball/basketball	volleyball, casual	4	8		For this is better to take the full volleyball at 8 MET since most people will have a competitive team
		competetive volleyball	8
		beach volleyball	8
		basketball	8
	Fishing	general	3	3
	horse riding	general	4	4		Use the general
		trot	6.5
		walking/riding	2.5
	snooker/billiards/darts	billiards	2.5	2.5
		darts	2.5
	musical instrument/singing	singing, standing CANNOT FIND	2	2.5		CANNOT FIND SINING
		cello	2			2.61538
		drums	4
		flute	2
		horn	2
		piano or organ	2.5
		trombone	3.5
		trumpet	2.5
		violin	2.5
		woodwind	2
		classic guitar (sitting)	2
		Rock and roll guitar (standing)	3
		marching band	4
	ice skating	ice skating, dance	14	7		Use the general
		general	7
		9 mph or less	5.5
		speed skating	13.3
	sailing, wind surfing, boating	sailing general	3	3		use the general
		competitive sailing	5
		boating	2.5
	mma, boxing, wrestling			7.75
		mma moderate pace	10
		boxing bag	6
		boxing sparring	9
		wrestling	6
	baseball/softball		5	5

## Sheet: Table S2
Supplemental Table S2: Calculation example of PAEE and PAEEw for one of the participants.
Activities	CONSTANT	Duration	OUTPUT		PAEE Values for each Activity
	MET	hours/day	MET-hrs/day					RMR (MJ/d) From Oxford	5.67343
TV or video	1	3.21429	3.21429		TV or video	79.2376		RMR (kJ/d) From Oxford	5673.43
computer	1.5	3	4.5		computer	465.522		Total PAEE	1883.41
Sleeping	1	8	8		Sleeping	197.214		PAEEw	30.7572
Sedentary	1.5	7.85714	11.7857		Sedentary	1219.22
Standing Occupation	2.5		0		Standing Occupation	0
Manual Labor	4		0		Manual Labor	0
heavy manual labor	7.5		0		heavy manual labor	0
Driving	2.5	0.0153061	0.0382653		Driving	6.37069
Taking bus	1.3		0		Taking bus	0
Bicycling	6.8	0.0153061	0.104082		Bicycling	23.5517
walking for transporation	3.5		0		walking for transporation	0			lbs	kg
Swimming-Competitive	9.5		0		Swimming-Competitive	0			135	61.2349
Swimming leisurely	6		0		Swimming leisurely	0		ft	in	cm
Backpacking/Mountain Climbing	7.5		0		Backpacking/Mountain Climbing	0		5	4	162.56
Walking for pleasure	3.5	0.0669643	0.234375		Walking for pleasure	45.3524		Age	Sex
Racing or rough terrain cycling	15		0		Racing or rough terrain cycling	0		30	F
Cycling for pleasure	6.3		0		Cycling for pleasure	0		Transportation occasions
mowing the lawn	5.5		0		mowing the lawn	0		usual (with ocassional)	Occasional	Usually (with Rarely)	Rarely
watering lawn/garden	1.5		0		watering lawn/garden	0		0.75	0.25	0.9	0.1
digging, shovelling, chopping wood	5		0		digging, shovelling, chopping wood	0
weeding/pruning	4.5		0		weeding/pruning	0
DIY e.g. carpentry, home or car maintenance	3.3		0		DIY e.g. carpentry, home or car maintenance	0
High impact aerobics	7.3		0		High impact aerobics	0
Other types of aerobics	5		0		Other types of aerobics	0
Weight Lifting	5.5		0		Weight Lifting	0
Conditioning exercise	8.5		0		Conditioning exercise	0
Floor Exercise	2.8	0.0892857	0.25		Floor Exercise	44.1546
Dancing	7.3		0		Dancing	0
Competitive running	14		0		Competitive running	0
Jogging	7		0		Jogging	0
bowling, lawn, 10-pin	3.3		0		bowling, lawn, 10-pin	0
Tennis/Badminton	7.15		0		Tennis/Badminton	0
Squash/Racquet ball	10		0		Squash/Racquet ball	0
Table Tennis	4		0		Table Tennis	0
Golf	4.8		0		Golf	0
football/soccer/rugby/hockey	8		0		football/soccer/rugby/hockey	0
Cricket	4.8		0		Cricket	0
Rowing	5.8		0		Rowing	0
netball/volleyball/basketball	8		0		netball/volleyball/basketball	0
Fishing	3.5		0		Fishing	0
horse riding	5.5		0		horse riding	0
snooker/billiards/darts	2.5		0		snooker/billiards/darts	0
musical instrument/singing	2		0		musical instrument/singing	0
ice skating	7		0		ice skating	0
sailing, wind surfing, boating	3		0		sailing, wind surfing, boating	0
mma, boxing, wrestling	8		0		mma, boxing, wrestling	0
baseball/softball	5		0		baseball/softball	0

## Sheet: Table S3
Supplemental Table S3: Machine Learning Data for 81 Participants
Sample Number	Total PAEE (kJ/d)	Weight (kg)	PAEEw (kJ/d*kg)	Sex	PA Labels	Age (years)	TG45:1	TG45:2	TG45:3	TG46:1	TG46:2	TG46:3	TG47:1	TG47:2	TG47:3	TG48:1	TG48:2	TG48:3	TG49:1	TG49:2	TG49:3	TG50:1	TG50:2	TG50:3	TG51:1	TG51:2	TG51:3	TG52:1	TG52:2	TG52:3	TG42:0	TG43:0	TG44:0	TG45:0	TG46:0	TG47:0	TG48:0	TG49:0	TG50:0	TG51:0	TG52:0	WE25:0	WE25:1	WE25:2	WE25:3	WE26:0	WE26:1	WE26:2	WE26:3
1	1824	49.88	36.5677	F	Inactive	24	0.109439	0.0647493	0.0224855	0.185093	0.127636	0.0445405	0.181392	0.133778	0.0498019	0.213234	0.200515	0.0898292	0.126059	0.130999	0.0625812	0.100002	0.137592	0.0858229	0.0380443	0.0566843	0.0373886	0.024726	0.0480602	0.0414392	0.0284467	0.0462139	0.101289	0.130717	0.206854	0.170471	0.172776	0.0689849	0.0455984	0.0156956	0.0129523	0.00141992	0.00646407	0.0053941	0.00120673	0.00222843	0.00636753	0.00508437	0.0018825
2	2139.81	61.2349	34.9443	F	Inactive	30	0.121909	0.0906183	0.0412459	0.21098	0.1823	0.0814415	0.180472	0.162122	0.076436	0.233527	0.258723	0.143829	0.128398	0.146159	0.0836806	0.121775	0.170136	0.11811	0.0527396	0.0701985	0.0477298	0.0508247	0.0706437	0.0574469	0.0345027	0.0479546	0.101628	0.112646	0.1868	0.142295	0.165757	0.0723122	0.0656166	0.032242	0.0382461	0.000492773	0.0056323	0.00783249	0.00280967	0.000730514	0.00551127	0.00789733	0.00510495
3	1833.93	62.5957	29.298	F	Inactive	18	0.131883	0.091116	0.0364126	0.234361	0.194297	0.0780506	0.199762	0.169406	0.0715749	0.248648	0.262449	0.134582	0.121237	0.136137	0.0716264	0.107042	0.14821	0.0976653	0.0366001	0.0515814	0.0338863	0.0332464	0.0527104	0.0397847	0.0383027	0.0480439	0.108859	0.12206	0.2001	0.149445	0.165291	0.059859	0.0517285	0.0177282	0.0385822	0	0.000261088	0.000610431	0.000632495	0.000709718	0.000511144	0.000753846	0
4	4810.6	77.1106	62.3857	M	Active	61	0.138893	0.0717993	0.0211576	0.226853	0.137213	0.0421061	0.243473	0.159328	0.0506038	0.269192	0.223321	0.0869726	0.16893	0.15595	0.0655941	0.123073	0.146169	0.0784773	0.0517108	0.065454	0.0377087	0.0343899	0.0503092	0.0353164	0.0299	0.0517488	0.0985302	0.139265	0.188199	0.176509	0.152479	0.0806273	0.0453607	0.0209651	0.0164158	0.000391983	0.00214046	0.0021951	0.0011712	0.000427617	0.00198605	0.00223786	0
5	3149.62	74.8427	42.0832	F	Inactive	21	0.278002	0.172472	0.0474602	0.433797	0.342894	0.109796	0.395905	0.329694	0.114589	0.432579	0.476669	0.223871	0.238743	0.290959	0.145546	0.173141	0.294133	0.209529	0.0692938	0.115394	0.0862047	0.037113	0.0872334	0.0940842	0.0550715	0.0765738	0.128162	0.155003	0.191053	0.16234	0.134618	0.0675866	0	0.0189872	0.010606	0.00047334	0.000485962	0	0	0.012493	0.00463873	0.000612186	0
6	2704.2	78.4714	34.461	M	Inactive	26	0.186226	0.135578	0.0514311	0.27373	0.243584	0.102105	0.237865	0.220905	0.0944182	0.258811	0.307009	0.163902	0.149458	0.185468	0.100982	0.119327	0.19009	0.132293	0.0514311	0.0814365	0.053499	0.0373788	0.0692641	0.0562979	0.0522405	0.0759586	0.13033	0.14434	0.191228	0.143964	0.132497	0.059828	0.0417966	0.0147677	0.0130497	0.00072063	0.00264231	0.00389558	0.00107572	0.000652745	0.00337339	0.00401047	0.00176502
7	2683.31	65.3172	41.0811	F	Inactive	19	0.531923	0.664148	0	0.638459	1.52777	1.49188	1.12618	2.58746	2.10578	1.33736	3.5255	3.91386	1.21005	4.06233	3.41708	0.806573	2.86022	3.87306	0.302985	2.19909	2.32641	0.0797129	0.740839	1.76426	0.111447	0.367964	0.0850019	0.159804	0.105025	0	0.104647	0.0661126	0	0	0	0	0.158292	0.364941	0.167737	0	0.14507	0.333585	0.406876
8	1823.03	63.5029	28.7078	F	Inactive	19	0.202821	0.165863	0.0730375	0.309066	0.286905	0.134167	0.28492	0.272438	0.128821	0.321887	0.363186	0.19935	0.180432	0.217035	0.123069	0.14393	0.209155	0.140433	0.0547105	0.0845741	0.0525907	0.0371268	0.0694903	0.0471771	0.0344327	0.0589756	0.114184	0.139969	0.204113	0.162949	0.159039	0.0639669	0.0421942	0.00979688	0.0103796	0	0.00244922	0.00432414	0.00228031	0	0.00315021	0.00467886	0.00473798
9	2200.15	77.1106	28.5324	F	Inactive	19	0.356925	0.506364	0.206638	0.599351	1.06179	0.689643	0.731819	1.38528	0.871475	0.7998	1.87392	1.81542	0.625356	1.54574	1.31051	0.424058	1.37085	1.84662	0.210681	0.750736	0.842076	0.0676816	0.448216	0.83414	0.00673821	0.0213127	0.0483654	0.093736	0.185276	0.189169	0.218867	0.102221	0.0629898	0.0403793	0.0309458	0.0142251	0.0204642	0.0210132	0	0.0169703	0.05715	0.0322436	0
10	8698.91	99.7902	87.1719	M	Active	20	0.318919	0.196997	0.293093	0.115315	0.183183	0.296697	0.213213	0.395796	0.622222	0.170571	0.559159	0.765766	0.21021	0.740541	0.996396	0.155556	0.427628	0.58018	0	0.345946	0.553153	0	0.192793	0.385586	0.18018	0.561562	0	0.165165	0	0	0	0	0	0.0930931	0	0	1.06787	1.63123	0.356156	0	0.842643	1.61982	0.921321
11	4798.97	77.1106	62.2348	F	Active	45	0.182448	0.110544	0.0374978	0.370056	0.276988	0.0980349	0.280932	0.2188	0.0803045	0.423426	0.427123	0.196648	0.183066	0.206798	0.102254	0.208004	0.311905	0.202652	0.0599759	0.0937552	0.0657061	0.0636828	0.122123	0.111517	0.042428	0.0539292	0.116266	0.121049	0.199814	0.139772	0.168316	0.0579895	0.0527952	0.0202645	0.0273772	0.000260199	0.00135148	0.00181945	0.00057671	0.00199033	0.00186411	0.00176508	0
12	1583.38	58.967	26.8519	F	Inactive	19	0.105726	0.0768465	0.0324666	0.199574	0.167894	0.071134	0.1616	0.142698	0.064216	0.228099	0.246859	0.129211	0.108757	0.127138	0.072117	0.111557	0.166316	0.116551	0.0355902	0.0551171	0.0407818	0.032397	0.0576179	0.0532006	0.0303986	0.0407834	0.106968	0.109384	0.217699	0.142882	0.194201	0.0597925	0.0565731	0.0182889	0.0230292	0.00163214	0.00548528	0.00589023	0.0026615	0.0022071	0.00630444	0.00624107	0
13	2261.87	61.2349	36.9375	F	Inactive	19	0.111742	0.122301	0.0662551	0.18383	0.234788	0.148818	0.202768	0.285076	0.180051	0.24439	0.412519	0.333862	0.166489	0.31271	0.24852	0.132531	0.300458	0.329221	0.0561103	0.151309	0.153247	0.0277624	0.104833	0.150405	0.0150202	0.0335746	0.0803279	0.105429	0.212785	0.161145	0.229987	0.0672983	0.0658718	0.012987	0.0155738	0	0.00738769	0.0149457	0.00629125	0	0.0076964	0.0141473	0.0119438
14	2164.87	61.2349	35.3535	F	Inactive	25	0.283901	0.199505	0.067098	0.388286	0.336068	0.120137	0.351366	0.333175	0.135234	0.346774	0.408036	0.206153	0.20088	0.268565	0.151555	0.156267	0.252524	0.178176	0.0610231	0.108776	0.0849533	0.0546887	0.122907	0.103604	0.0592633	0.0834024	0.131356	0.151406	0.176876	0.140581	0.119803	0.0545874	0.0421127	0.0168573	0.0237551	0.00313767	0.00160365	0.00097063	0	0.0147557	0.0130107	0.00659184	0.000443114
15	6123.72	99.7902	61.3659	M	Active	21	0.178361	0.120063	0.0420544	0.284088	0.230937	0.0868656	0.299113	0.259517	0.103832	0.335746	0.38097	0.194305	0.219611	0.277632	0.153008	0.170549	0.290199	0.213477	0.0725642	0.135571	0.107152	0.0463965	0.112126	0.114274	0.0297057	0.055322	0.0996163	0.135537	0.190801	0.173203	0.161888	0.0777908	0.050888	0.0144278	0.0108209	0	0.00601925	0.0112459	0.0046408	0	0.00638684	0.0112574	0.00589289
16	6578.08	75.7499	86.8395	F	Active	21	0.171679	0.140076	0.0628061	0.289688	0.258172	0.114924	0.277433	0.265269	0.124465	0.345836	0.387786	0.202718	0.193404	0.245333	0.141199	0.174133	0.274275	0.188332	0.0632545	0.110324	0.0825973	0.046467	0.0999778	0.0929244	0.0316658	0.0487233	0.102634	0.125415	0.200303	0.165744	0.175724	0.0705539	0.0490849	0.0172937	0.0128582	0.000612296	0.00452231	0.00673043	0.00245883	0.000462838	0.00419929	0.00669669	0.00305666
17	2728.53	74.8427	36.4569	M	Inactive	20	0.166671	0.115052	0.0406621	0.275278	0.225939	0.0839142	0.274848	0.247661	0.0982718	0.318291	0.357438	0.175586	0.195326	0.239593	0.130472	0.157851	0.248377	0.171504	0.0625149	0.105994	0.0805605	0.0487898	0.0959684	0.0866831	0.0345515	0.0496969	0.0987612	0.127059	0.18468	0.162553	0.165083	0.07735	0.0624791	0.0176994	0.0200864	0.0079725	0.0211725	0.0197642	0.0038311	0.0339309	0.0266029	0.0193345	0.00448752
18	1017.31	49.8951	20.389	F	Inactive	18	0.105451	0.0749654	0.028618	0.165108	0.139032	0.0579798	0.151879	0.136694	0.0592861	0.165567	0.185425	0.100082	0.0926022	0.112692	0.0635062	0.0713601	0.107639	0.0784169	0.0303907	0.0447961	0.0320839	0.0241167	0.035163	0.029914	0.0301354	0.0487647	0.110729	0.134848	0.212301	0.160619	0.159148	0.0603151	0.0425115	0.0195906	0.0210376	0	0.000746319	0.000933876	0.000566577	0	0.000758041	0.000913036	0
19	5100.49	80.7394	63.1723	M	Active	31	0.162854	0.13459	0.0596368	0.2794	0.26015	0.117395	0.306977	0.295854	0.134918	0.371457	0.442536	0.235102	0.24281	0.305174	0.171295	0.194456	0.312484	0.218808	0.0905133	0.145658	0.105195	0.0664202	0.115783	0.102972	0.0209611	0.0383702	0.0777487	0.112804	0.176672	0.172822	0.178804	0.0962883	0.0680091	0.0297077	0.0278132	0	0.00541598	0.00785278	0.00334584	0.00245209	0.00605764	0.00839514	0.00415556
20	3091.97	99.7902	30.9847	M	Inactive	26	0.190209	0.100415	0.026517	0.31441	0.203463	0.0590437	0.316523	0.22031	0.0669044	0.380206	0.342554	0.13212	0.241961	0.247398	0.103902	0.206077	0.284243	0.161097	0.0851072	0.130974	0.0828785	0.0621822	0.144423	0.116604	0.0346099	0.0568105	0.102135	0.130838	0.178231	0.16008	0.152883	0.0771163	0.0572912	0.0239713	0.0260343	0.000667211	0.00140941	0.00111637	0.000294386	0.00100139	0.00220875	0.00124785	0.000762141
21	5135.99	127.006	40.439	M	Active	28	0.216547	0.147723	0.0518727	0.29764	0.237222	0.0887353	0.309598	0.267935	0.105856	0.308981	0.326362	0.154501	0.218298	0.249301	0.12533	0.156827	0.221166	0.139565	0.0847255	0.119301	0.0772338	0.0579414	0.0859477	0.0685213	0.0454117	0.0713586	0.108609	0.138079	0.162547	0.151684	0.127935	0.0809428	0.0543595	0.0322415	0.0268317	0.00660181	0.0138748	0.0139776	0.00530522	0.00736674	0.0157414	0.0148852	0.00703898
22	2227.66	79.3786	28.0637	M	Inactive	24	0.290043	0.254581	0.107096	0.474285	0.502302	0.222052	0.511333	0.56215	0.251223	0.604742	0.856374	0.479554	0.423259	0.618586	0.350972	0.334814	0.666852	0.509688	0.163966	0.3272	0.248326	0.101956	0.264054	0.279826	0.0259085	0.048596	0.0876464	0.122352	0.168455	0.169084	0.163748	0.104254	0.0705477	0.0258804	0.0135288	0.0275935	0.0720181	0.0828068	0.036956	0.0325051	0.0872175	0.0899484	0.0695348
23	3112.44	79	39.398	M	Inactive	31	0.231004	0.156768	0.0558473	0.322956	0.253675	0.0970549	0.331101	0.283961	0.113378	0.331249	0.34546	0.166213	0.219208	0.259726	0.137137	0.151431	0.226125	0.150716	0.0680908	0.112504	0.082289	0.0404162	0.0772079	0.0703727	0.0453905	0.0708646	0.114037	0.146466	0.178753	0.161113	0.134325	0.0731195	0.0439984	0.0190953	0.0128372	0.00946088	0.0138564	0.0124337	0.00422274	0.0107712	0.0181319	0.0137294	0.00152416
24	2420.02	71	34.0848	M	Inactive	38	0.170774	0.0994009	0.0319004	0.263278	0.184081	0.0620953	0.264294	0.201521	0.0718221	0.283997	0.270557	0.118385	0.172768	0.18523	0.0873702	0.126146	0.176939	0.10652	0.0509416	0.0779862	0.0508431	0.03115	0.0588608	0.0517632	0.0328229	0.0576264	0.106611	0.143414	0.193618	0.171291	0.15237	0.0703035	0.0412996	0.0173101	0.013334	0.00346552	0.00898928	0.00865452	0.00268831	0.00577123	0.00979854	0.00881251	0.00311821
25	4240.98	99.7902	42.4989	F	Inactive	27	0.171415	0.0944358	0.022514	0.276161	0.189025	0.0541928	0.285337	0.212573	0.0660366	0.33078	0.317564	0.128727	0.209919	0.230065	0.10454	0.172424	0.256634	0.157109	0.0699798	0.116667	0.0797629	0.048856	0.110712	0.102507	0.0335439	0.0527119	0.10074	0.129604	0.188107	0.166847	0.163448	0.0773704	0.0520099	0.0192902	0.0163284	0.00217246	0.00458592	0.00350668	0.000572804	0.00385944	0.00702732	0.00332156	0
26	2443.54	81.6466	29.9282	M	Inactive	52	0.157176	0.128242	0.0626113	0.238574	0.213741	0.103843	0.271168	0.261733	0.13058	0.30089	0.344395	0.195299	0.222774	0.286263	0.180204	0.175011	0.281554	0.204857	0.0835965	0.153214	0.120891	0.0497888	0.120538	0.111465	0.0175315	0.042996	0.0857952	0.126166	0.190992	0.181755	0.179753	0.0874113	0.0590426	0.0165142	0.0120432	0	0.00176381	0.00427417	0.00183765	0	0.00159153	0.00388039	0.00343738
27	1868.93	63.5029	29.4307	F	Inactive	21	0.151332	0.0761805	0.016929	0.243252	0.141448	0.0410981	0.217788	0.133001	0.0378862	0.254396	0.192412	0.0698454	0.140951	0.119692	0.0433872	0.124377	0.134066	0.0619488	0.0384185	0.0478058	0.0199457	0.0383121	0.060334	0.0310542	0.0491189	0.0704843	0.130676	0.151545	0.198942	0.158341	0.138768	0.057548	0.0327223	0.00628183	0.00557202	0	0.00805636	0.00668997	0	0.0152255	0.0146221	0.00699164	0
28	2320.69	68	34.1279	F	Inactive	33	0.948938	0.665953	0.0867702	1.84538	1.9168	0.589716	1.66863	1.74076	0.372791	2.1389	3.015	1.67756	0.871987	1.55776	0.736833	0.901089	2.12105	1.56454	0.0639172	0.428673	0.324049	0.0753437	1.40832	1.17086	0	0.0490984	0.0905196	0.144617	0.25424	0.16872	0.220853	0.0335654	0.038386	0	0	0	0	0	0	0	0	0	0
29	5399.27	90.7184	59.5168	M	Active	21	0.246754	0.173426	0.041902	0.427536	0.368919	0.140018	0.430676	0.387594	0.152348	0.557036	0.663414	0.333425	0.364303	0.447812	0.236489	0.330874	0.55967	0.382915	0.131734	0.244478	0.155742	0.0899165	0.237417	0.218637	0.0180845	0.0381924	0.0882303	0.12558	0.197032	0.176334	0.190224	0.0904435	0.0553073	0.0113818	0.00918978	0	0.00644971	0.00847315	0.00288762	0	0.00737712	0.00777759	0
30	5989.45	113.398	52.818	F	Active	44	0.143716	0.0675159	0.00974122	0.224992	0.133267	0.0299925	0.233615	0.152286	0.0392008	0.270194	0.219785	0.075999	0.178444	0.168484	0.063235	0.151587	0.185843	0.0866925	0.0583163	0.0868847	0.039524	0.0430099	0.0877234	0.0469501	0.029346	0.0536772	0.10628	0.139155	0.197306	0.165924	0.164876	0.0664762	0.0502437	0.011043	0.0156733	0.00315388	0.00242875	0.00152889	0	0.00324125	0.00192204	0.00127553	0
31	4857.4	89.8112	54.0845	F	Active	25	0.269933	0.167716	0.0436281	0.415495	0.314727	0.0987109	0.417093	0.344629	0.119241	0.46782	0.477913	0.204899	0.282433	0.333201	0.157131	0.249754	0.358079	0.216435	0.0975513	0.156969	0.103741	0.117319	0.25206	0.162936	0.0371691	0.056202	0.10403	0.130945	0.163502	0.1484	0.145643	0.0729292	0.080777	0.0161675	0.0442348	0.00109896	0	0	0	0.00380254	0.0016181	0	0
32	1902.19	61.6885	30.8355	F	Inactive	25	0.321119	0.202399	0.0496332	0.538002	0.439946	0.148728	0.398375	0.336502	0.113913	0.471738	0.528934	0.250993	0.208881	0.248928	0.117665	0.17425	0.280668	0.182798	0.043446	0.0811817	0.0452929	0.0320385	0.0886594	0.0639172	0.0603495	0.0864185	0.15579	0.161843	0.208272	0.144597	0.130443	0.0457016	0	0.0035653	0.00301919	0	0	0	0	0	0.00181853	0	0
33	8469.3	83.9145	100.928	M	Active	30	0.0739843	0.041127	0.0129153	0.144166	0.0901791	0.0302853	0.127867	0.0853182	0.0311221	0.190972	0.151316	0.0632472	0.0955815	0.0890531	0.0396626	0.113579	0.12767	0.0670867	0.0365614	0.0465478	0	0.0461048	0.0840199	0.0581956	0.023197	0.0344325	0.0953046	0.10678	0.210484	0.151291	0.203383	0.0653023	0.0622627	0.0200036	0.0275595	0	0	0	0	0	0	0	0
34	2215.04	50	44.3007	F	Inactive	24	0.176012	0.123784	0.0453388	0.295816	0.247544	0.0957026	0.247772	0.216803	0.089518	0.307981	0.336517	0.172146	0.158618	0.187244	0.101046	0.139063	0.212142	0.143543	0.0490678	0.0772851	0.04809	0.0375398	0.07392	0.0616871	0.0429513	0.0630059	0.12126	0.135675	0.202797	0.151182	0.155412	0.0606412	0.0415871	0.0123693	0.0131196	0	0.00125057	0.00234197	0.00115962	0	0.0015689	0.00306958	0.00170532
35	2220.51	70.3068	31.5832	F	Inactive	22	0.114013	0.0747072	0.0210912	0.213071	0.163986	0.0589452	0.190854	0.156668	0.060643	0.247805	0.245601	0.120571	0.118711	0.136747	0.0708066	0.106643	0.153841	0.101076	0.0265992	0.0479261	0.030179	0.0191181	0.0438973	0.0352477	0.0234557	0.0341773	0.107173	0.125325	0.230119	0.168576	0.19882	0.0571431	0.0398253	0.00715759	0.00822779	0	0	0	0	0	0	0	0
36	3647.12	70.3068	51.8743	F	Active	21	0.252471	0.152581	0.0415752	0.379059	0.280873	0.0885372	0.350203	0.282352	0.0951733	0.37796	0.387321	0.168372	0.21506	0.249839	0.118616	0.164809	0.251331	0.158946	0.0627449	0.10389	0.0694179	0.0429327	0.0828935	0.0731634	0.0508007	0.0755952	0.127042	0.151093	0.191512	0.156643	0.136206	0.0618448	0.0191854	0.0160097	0.0140675	0.00018085	0.000553835	0	0	0.000973068	0.00126326	0.00016228	0
37	4777.12	61.2349	78.013	F	Active	28	0.2878	0.199177	0.069499	0.399172	0.328882	0.13102	0.426791	0.389845	0.156507	0.432364	0.486016	0.246725	0.311611	0.397475	0.217899	0.219337	0.359132	0.258021	0.107584	0.195225	0.149504	0.0646073	0.135694	0.134372	0.0448906	0.0767685	0.120971	0.154995	0.182867	0.171189	0.143624	0.0843922	0	0	0.0203026	0.424475	0.0765028	0.0126653	0.000926563	0.00102876	0.00375394	0.00228916	0
38	1942.88	63.5029	30.5951	F	Inactive	22	0.233069	0.187939	0.0743763	0.402258	0.390406	0.177461	0.383131	0.378761	0.175038	0.478859	0.606084	0.353255	0.287497	0.374148	0.219349	0.238196	0.420756	0.332809	0.0956067	0.173605	0.135318	0.0670334	0.149488	0.154783	0.0204008	0.0437918	0.0989754	0.125889	0.20265	0.174364	0.195583	0.0871404	0.0304452	0.00717575	0.0135846	0	0	0.00203607	0	0	0	0.00122148	0
39	3134.07	58.0598	53.9801	F	Active	19	0.148515	0.095251	0.0343719	0.231303	0.178774	0.0658875	0.196605	0.161779	0.0630288	0.221421	0.231565	0.108349	0.117809	0.134058	0.0711786	0.0948362	0.141329	0.0920295	0.0376661	0.0553196	0.0381523	0.0279179	0.0470295	0.0417202	0.0399217	0.0589366	0.118725	0.13348	0.203336	0.148975	0.153286	0.0593345	0.0438106	0.0212969	0.0188978	0.00447771	0.00874459	0.00919155	0.00441411	0.00458408	0.0109108	0.00941523	0
40	5753.68	86.6361	66.412	M	Active	22	0.0994221	0.0711315	0.0289829	0.157767	0.126828	0.0535913	0.159639	0.135498	0.0583597	0.180939	0.183876	0.0926892	0.111473	0.123948	0.0693599	0.0869017	0.119159	0.0787163	0.0385325	0.0538832	0.0370271	0.0265425	0.0436251	0.0370051	0.0225262	0.0386597	0.0847079	0.116351	0.194062	0.171917	0.185001	0.0783955	0.0575963	0.0270372	0.0237462	0.00383529	0.01173	0.0130218	0.00622081	0.00430395	0.0127399	0.0129185	0.00356623
41	1659.65	53.5239	31.0076	F	Inactive	20	0.248827	0.210356	0.105572	0.381633	0.390372	0.183126	0.337389	0.362599	0.180213	0.382154	0.530718	0.306496	0.231607	0.336128	0.224764	0.191582	0.364938	0.281996	0.0928335	0.15843	0.122466	0.0667259	0.139341	0.141791	0.0515716	0.0699485	0.110413	0.124006	0.159291	0.13416	0.127416	0.0790769	0.0599741	0.0492472	0.0348962	0.0240133	0.0579695	0.0545723	0.0334114	0.0499297	0.0696647	0.0569888	0
42	6909.41	77.1106	89.6038	F	Active	26	0.204552	0.124565	0.0399363	0.332638	0.245077	0.0788828	0.298555	0.230274	0.0796444	0.350195	0.343121	0.147507	0.195627	0.207149	0.0922877	0.160542	0.225846	0.131382	0.0629783	0.0904065	0.0535443	0.0444924	0.0796604	0.0624608	0.0471138	0.0694091	0.119872	0.141846	0.181753	0.152121	0.135101	0.0699704	0.0435058	0.0221325	0.017175	0.00528225	0.00899064	0.00636292	0.00139832	0.0308353	0.0122602	0.00575812	0.00154477
43	4661.87	95.2543	48.9413	F	Active	60	0.122591	0.082634	0.0360805	0.181441	0.133363	0.0562129	0.190376	0.152177	0.0660581	0.210547	0.198372	0.094958	0.143857	0.156493	0.0862883	0.120282	0.15898	0.0982019	0.0540749	0.0810434	0.0561713	0.0388215	0.0710637	0.0593823	0.0297142	0.0474171	0.0899699	0.119902	0.18514	0.164264	0.176247	0.0780972	0.0591324	0.0259494	0.0241678	0.0085027	0.0210842	0.0222275	0.0126834	0.00781619	0.0190707	0.0210068	0.0168591
44	1469.56	50.8023	28.9271	F	Inactive	24	0.0550345	0.0397444	0.0185151	0.107439	0.084067	0.0394721	0.0829014	0.0671919	0.033154	0.0387725	0.108542	0.0611836	0.050549	0.0509549	0.0306831	0.0319735	0.0556049	0.0380701	0.0154316	0.0180493	0.0126827	0.014916	0.0174023	0.00850291	0.0253767	0.0356613	0.106739	0.112111	0.233456	0.151319	0.205311	0.0571251	0.0329894	0.0176058	0.0223051	0.00198994	0.0051952	0.00478895	0.00309568	0.0040167	0.00587046	0.00499425	0.00568112
45	1745.94	54.431	32.0762	M	Inactive	20	0.106551	0.0713459	0.0304961	0.15249	0.114382	0.0482655	0.150586	0.121538	0.0531035	0.162159	0.156785	0.0772192	0.106025	0.112836	0.0629245	0.0831404	0.107631	0.0682478	0.040646	0.0539957	0.0363235	0.0294868	0.0428331	0.0345493	0.0315519	0.0503919	0.0943755	0.123395	0.183594	0.161989	0.163378	0.0769087	0.0569799	0.0298384	0.0275989	0.0109066	0.0201288	0.0205145	0.01162	0.00955	0.0187287	0.0193069	0.0122713
46	1974.16	72.5747	27.2018	F	Inactive	20	0.0754213	0.0497977	0.0209416	0.114026	0.0848818	0.0370454	0.094154	0.0747635	0.033564	0.105026	0.0965939	0.0505146	0.0526718	0.0537756	0.0311747	0.0483484	0.0536488	0.0350111	0.0178999	0.0208222	0.0145416	0.0169703	0.0218812	0.0163534	0.0349345	0.0514943	0.118297	0.131304	0.213196	0.147522	0.162291	0.053674	0.0453198	0.0198403	0.022129	0.00467012	0.00783501	0.00764007	0.004029	0.00500728	0.00827715	0.00753019	0.00484674
47	2272.85	77.1106	29.4752	M	Inactive	19	0.143271	0.0805096	0.0228449	0.227934	0.148211	0.0448355	0.230107	0.163846	0.0520236	0.254061	0.223526	0.0852282	0.157387	0.157025	0.0651077	0.124068	0.153888	0.079267	0.0541976	0.072056	0.0398478	0.04054	0.0605507	0.0407859	0.0293428	0.0514303	0.0996889	0.134494	0.190571	0.167748	0.154995	0.0735848	0.051708	0.0235642	0.0228724	0.00351989	0.00845544	0.00930603	0	0.00417277	0.0091277	0.00868659	0
48	4338.48	99.7902	43.476	F	Inactive	22	0.137022	0.089321	0.0294695	0.247535	0.194726	0.071741	0.222926	0.180962	0.0668261	0.280563	0.287262	0.134368	0.14483	0.158287	0.0758041	0.127393	0.175406	0.110671	0.0416807	0.0619619	0.0390243	0.0335044	0.0638707	0.047813	0.0225822	0.03916	0.0974596	0.122401	0.210487	0.166496	0.189801	0.06883	0.0518093	0.0146299	0.016345	0.00348334	0.00995057	0.0143557	0.0146093	0.00412881	0.0109932	0.0133188	0
49	991.691	49.8951	19.8755	F	Inactive	21	0.232272	0.179906	0.0804661	0.381458	0.363376	0.154187	0.378629	0.369863	0.157905	0.442156	0.566762	0.298268	0.282747	0.365193	0.192558	0.221861	0.391046	0.282812	0.10141	0.171361	0.120569	0.0687232	0.139476	0.13585	0.0220741	0.0458426	0.091097	0.118962	0.176833	0.163699	0.176243	0.093172	0.0806788	0.0168323	0.0145653	0.041442	0.102527	0.116422	0	0.0627523	0.110208	0.114182	0
50	10564.1	81.193	130.111	M	Active	21	0.0868582	0.044375	0.018704	0.129101	0.0692162	0.0258402	0.136666	0.0784501	0.0289586	0.155747	0.105273	0.040577	0.110356	0.087214	0.036625	0.0913195	0.0921648	0.0450231	0.0414138	0.0510297	0.0289051	0.0265997	0.0429331	0.0303316	0.030175	0.050422	0.0972422	0.131111	0.194358	0.171451	0.16528	0.0744914	0.0497562	0.0198562	0.0158563	0.0103438	0.0220269	0.0243185	0.0193085	0.0166441	0.0224499	0.0231712	0
51	6985.82	86.1825	81.0585	F	Active	18	0.0820685	0.0484637	0.0195264	0.136223	0.0861259	0.032572	0.138396	0.093002	0.0354145	0.172129	0.136916	0.0574591	0.104456	0.0951113	0.043201	0.091285	0.104624	0.0565456	0.0353024	0.0469271	0.0277927	0.024318	0.0422123	0.0304535	0.023996	0.040197	0.0896227	0.117938	0.202021	0.172375	0.193288	0.075198	0.0531953	0.017454	0.0147159	0.0107138	0.0206544	0.0265128	0.0129357	0.0103171	0.0195014	0.0247718	0
52	1515.74	55.7918	27.1678	F	Inactive	18	0.131008	0.0927114	0.0379221	0.203704	0.165805	0.0681765	0.198106	0.164258	0.0666971	0.219497	0.223387	0.10787	0.129354	0.136699	0.0675858	0.0957677	0.128004	0.0795683	0.0423933	0.0559384	0.0346669	0.0292668	0.0422942	0.0323715	0.0270188	0.0449073	0.0917423	0.120134	0.193559	0.166784	0.178229	0.0769906	0.0565105	0.0225613	0.0215641	0.0228421	0.0316379	0.0386933	0	0.0202436	0.0308996	0.0371826	0
53	2491.71	81.6466	30.5183	M	Inactive	20	0.0794724	0.0509414	0.0219678	0.132711	0.0931538	0.0385226	0.128146	0.0945185	0.039221	0.156337	0.137673	0.0653603	0.0897505	0.087198	0.0436502	0.075172	0.0892965	0.054566	0.0291572	0.0382114	0.0244678	0.0204122	0.0320459	0.0247405	0.0228282	0.0371988	0.0893814	0.115011	0.206311	0.169111	0.196252	0.0747691	0.0562005	0.0183577	0.0145791	0.0100398	0.0187271	0.0250087	0.0134004	0.0101046	0.0185924	0.0232903	0
54	2380.1	90.7184	26.2362	M	Inactive	19	0.0621921	0.033464	0.0117124	0.102104	0.0583965	0.0204084	0.109651	0.065609	0.0231352	0.13413	0.0936496	0.0371393	0.085864	0.0666862	0.0278604	0.0708375	0.0678893	0.0327789	0.0290738	0.0309424	0.0150136	0.0174241	0.0238222	0.0143055	0.0147928	0.0315956	0.0748548	0.109273	0.195686	0.180515	0.20817	0.0864019	0.0602594	0.0203275	0.0181233	0.0147404	0.0242418	0.0249512	0	0.013884	0.0214597	0.0228268	0
55	2030.76	61.2349	33.1634	F	Inactive	18	0.0801109	0.0522911	0.0231105	0.140894	0.102533	0.043303	0.109286	0.082495	0.035969	0.145263	0.13092	0.0646462	0.0675394	0.0670405	0.0352535	0.0643141	0.0777992	0.0483926	0.0210888	0.0271175	0.0175661	0.0183839	0.0258333	0.0195711	0.0336139	0.0464412	0.114794	0.118827	0.220099	0.143228	0.180509	0.0559494	0.0498845	0.0156901	0.0209637	0.0121504	0.0214046	0.0258448	0.0182303	0.0108337	0.020627	0.0243931	0
56	3001.71	58.967	50.9049	F	Active	18	0.108527	0.0788185	0.0338578	0.186004	0.155293	0.0661804	0.161899	0.140886	0.0617647	0.195461	0.209376	0.109418	0.0977099	0.112228	0.0616565	0.0780851	0.115797	0.082188	0.0267809	0.0419712	0.030234	0.0174755	0.0344866	0.0322239	0.0261487	0.0411317	0.101334	0.120313	0.222021	0.163456	0.194947	0.06262	0.0470734	0.0108323	0.0101233	0.0190102	0.031129	0.0384252	0.0168521	0.021562	0.0324314	0.0369676	0
57	2310.51	61.2349	37.7319	F	Inactive	21	0.119488	0.0729979	0.0252153	0.183658	0.129335	0.0469652	0.173546	0.128712	0.0464627	0.193918	0.178289	0.0772337	0.114486	0.114916	0.0506733	0.0910479	0.119447	0.0679732	0.0328062	0.0484281	0.0271183	0.024033	0.052043	0.03461	0.0261102	0.0496364	0.10792	0.135594	0.202	0.167664	0.170474	0.0678197	0.047651	0.00591459	0.0192171	0.0153423	0.0280347	0.0345715	0.0272849	0.0167607	0.0242663	0.0301515	0
58	4068.99	79.3786	51.2605	M	Active	21	0.0720341	0.0414006	0.0134124	0.112302	0.0734052	0.026152	0.103151	0.0717497	0.0263642	0.115069	0.0967383	0.0430481	0.062337	0.0590755	0.0271973	0.0475346	0.0553647	0.032221	0.0139073	0.0194881	0.0104162	0.00770948	0.0139863	0.00976092	0.0254329	0.0448571	0.104251	0.133858	0.217077	0.171276	0.174232	0.0626139	0.0429325	0.0116272	0.0118413	0.00416704	0.0132882	0.0186152	0.0144081	0.00457584	0.0122098	0.0168996	0
59	2811.37	83.0073	33.8689	M	Inactive	22	0.153685	0.0967989	0.0276731	0.269003	0.201905	0.0645054	0.30212	0.236044	0.0756658	0.377597	0.381216	0.163699	0.262736	0.275699	0.117532	0.229069	0.315621	0.187539	0.0914779	0.141237	0.0788579	0.0895938	0.13275	0.102823	0.0104753	0.0303855	0.0790147	0.12117	0.182349	0.189674	0.194229	0.112806	0.0624434	0.0131669	0.00428586	0.0436029	0.0941594	0.11419	0.0727228	0.0577898	0.0888612	0.10784	0
60	4434.16	72.5747	61.0979	M	Active	21	0.113314	0.0729318	0.026617	0.173501	0.126733	0.048233	0.157812	0.121455	0.0474136	0.180117	0.171273	0.0776778	0.106985	0.112012	0.0531729	0.0870807	0.117422	0.0706097	0.0327747	0.0508613	0.0295264	0.0199194	0.0421297	0.032069	0.032489	0.0515313	0.107395	0.127044	0.203698	0.157468	0.173995	0.06744	0.0536373	0.0114452	0.0138577	0.0133979	0.0313305	0.04309	0.0313631	0.0155846	0.031742	0.0405538	0
61	3453.5	54.431	63.4472	F	Active	20	0.144339	0.069408	0.0117403	0.226679	0.131567	0.0292293	0.221539	0.13789	0.0355801	0.252757	0.202038	0.0713737	0.154601	0.13972	0.052593	0.12895	0.155336	0.0794901	0.0487045	0.0659495	0.0331364	0.0344864	0.0713335	0.0499333	0.0592365	0.0690288	0.118434	0.142467	0.187418	0.162893	0.148997	0.0727669	0.0268021	0.00664533	0.00531058	0.0189175	0.0206456	0.0217137	0.00833019	0.183915	0.0306492	0.0212749	0.00961003
62	11137.6	81.6466	136.412	M	Active	19	0.0682711	0.0360253	0.0109855	0.0966346	0.0559568	0.0184103	0.0945746	0.0596512	0.0205383	0.0963684	0.0720565	0.0288138	0.0601607	0.0517795	0.0220432	0.0445823	0.0469076	0.0231941	0.0146316	0.019372	0.0096069	0.0077983	0.0156646	0.00934047	0.0459432	0.0545958	0.108524	0.138501	0.197358	0.170631	0.153685	0.0663841	0.0415818	0.012404	0.0103915	0.00713527	0.0156	0.0187333	0.00917282	0.00815814	0.0134596	0.0161861	0
63	6874.53	81.6466	84.1986	F	Active	20	0.0789662	0.0486974	0.0196514	0.111962	0.0749499	0.0307254	0.107142	0.0768207	0.0322818	0.107093	0.0891707	0.0424512	0.0607732	0.0570102	0.0288334	0.0435805	0.0481585	0.0287519	0.0166289	0.0198912	0.0118452	0.0113686	0.0165887	0.010672	0.0265251	0.0470206	0.099807	0.136922	0.205985	0.172406	0.162691	0.062941	0.0445531	0.0171036	0.0240455	0.00669249	0.0156017	0.021439	0.0158968	0.00876727	0.0164619	0.0202883	0
64	2108.73	58.967	35.7613	F	Inactive	20	0.0878685	0.0525432	0.0184032	0.142686	0.0955695	0.0355468	0.127282	0.0887196	0.0338411	0.148394	0.12544	0.0563578	0.0785457	0.07306	0.034127	0.0617325	0.0732377	0.0429262	0.0186145	0.0264792	0.0138608	0.0105686	0.0216781	0.0152827	0.0280338	0.0466979	0.107841	0.131429	0.217326	0.166978	0.17989	0.0637068	0.0415189	0.00894588	0.00763392	0.0037723	0.0119059	0.0188792	0.0133274	0.00541909	0.01097	0.0171053	0.0130024
65	2708.74	65	41.6729	F	Inactive	28	0.227681	0.130759	0.0375448	0.323382	0.249143	0.0789489	0.287439	0.227882	0.0770477	0.282588	0.305777	0.147343	0.157573	0.184483	0.0910095	0.108012	0.180222	0.129978	0.0420588	0.0745477	0.0552962	0.0303629	0.0658633	0.0695505	0.060845	0.088929	0.134043	0.156631	0.184231	0.155032	0.125934	0.0596291	0.0217629	0.00706996	0.00589275	0.0129511	0.0109117	0.0128398	0.00432961	0.0208093	0.0128386	0.0119491	0.0040155
66	2249.52	52.6167	42.7529	F	Inactive	33	0.170623	0.140724	0.0753546	0.25429	0.22055	0.10894	0.284112	0.250075	0.11975	0.331819	0.342268	0.175249	0.243657	0.273016	0.144439	0.209179	0.289579	0.181717	0.107659	0.158338	0.102855	0.0758466	0.141817	0.111905	0.0165824	0.0375742	0.0846464	0.118883	0.171584	0.175969	0.181774	0.106434	0.0720175	0.0190973	0.0154391	0.0424702	0.121294	0.172062	0.141637	0.0526161	0.11416	0.158313	0
67	7430.27	95.2543	78.0046	M	Active	21	0.137009	0.0601855	0.00293848	0.20818	0.113567	0.0194877	0.196014	0.119408	0.0230377	0.209235	0.161381	0.0491617	0.118569	0.106574	0.0339596	0.0946682	0.111366	0.0480912	0.0235879	0.0392332	0.013571	0.0159518	0.06199	0.0438978	0.0283488	0.0551495	0.120976	0.151459	0.213142	0.171797	0.16302	0.0576945	0.0320411	0.00289477	0.00347644	0.00319671	0.00474416	0.00910937	0.00668843	0.00296384	0.00543035	0.00867732	0.0111574
68	6848.21	63.5029	107.841	F	Active	24	0.0660743	0.0405636	0.0157444	0.109692	0.0737562	0.0263907	0.105832	0.0751499	0.0272084	0.141114	0.116365	0.0495404	0.0874135	0.081849	0.0363921	0.0874268	0.101631	0.0548959	0.0329345	0.0459319	0.0242394	0.0273202	0.0464616	0.0325739	0.0128694	0.0251064	0.0757505	0.0960804	0.190859	0.158788	0.221084	0.080865	0.0841315	0.0222096	0.0322558	0.0129368	0.0324998	0.0443434	0.0330008	0.0463784	0.0397798	0.0427059	0
69	4242.68	68.0388	62.3567	F	Active	21	0.143946	0.0668374	0.0169654	0.251592	0.140831	0.0365567	0.232275	0.137534	0.0371346	0.286938	0.224997	0.0778978	0.159336	0.139076	0.0519581	0.13831	0.164735	0.084225	0.0503724	0.064331	0.0354947	0.0451802	0.0659914	0.051983	0.0406073	0.0599384	0.113115	0.138214	0.190808	0.160632	0.148795	0.0705301	0.0438573	0.0176451	0.0158597	0.0116236	0.0109003	0.0147888	0.00533391	0.0222314	0.0112024	0.0141812	0.00678067
70	5355.46	74.8427	71.5562	F	Active	21	0.180135	0.0626742	0.00389297	0.354353	0.256417	0.0180595	0.342904	0.225283	0.0262751	0.435636	0.441042	0.118414	0.28674	0.277937	0.0639231	0.217687	0.376777	0.192273	0.0752202	0.0999044	0.0344735	0.0146469	0.0879827	0.0838925	0.152188	0.0658399	0.1071	0.0972811	0.162627	0.159122	0.117593	0.0986211	0.0104363	0.0291914	0	0.213876	0.403327	0.336725	0.0942163	4.31663	0.776994	0.366626	0.114337
71	4106.92	108.862	37.7259	M	Inactive	27	0.230833	0.149371	0.0434206	0.352371	0.269332	0.0885246	0.361307	0.29892	0.104427	0.38627	0.404183	0.171245	0.248049	0.285783	0.130712	0.176398	0.268041	0.157158	0.0718762	0.124807	0.0697923	0.0307342	0.0847124	0.0604023	0.0268351	0.0581864	0.110394	0.145314	0.191105	0.176253	0.159212	0.0857476	0.0316541	0.00872637	0.00657254	0.0982025	0.117848	0.112829	0	0.150887	0.133799	0.110721	0
72	5819.15	84.8217	68.6045	F	Active	30	0.0694418	0.0408164	0.016911	0.116114	0.0707019	0.0263642	0.101673	0.0640565	0.0248271	0.136269	0.0995685	0.041356	0.0759761	0.0633628	0.027668	0.0774443	0.0795101	0.0403238	0.0256101	0.0324437	0.0156418	0.0256945	0.0406577	0.0235807	0.0343386	0.043262	0.0992524	0.110557	0.205652	0.150658	0.196588	0.0657045	0.0587551	0.0125596	0.0226727	0.0168249	0.0329747	0.0387869	0.0254851	0.0514286	0.0370278	0.0365113	0.00922744
73	4907.41	97.5223	50.3209	M	Active	23	0.114622	0.0684695	0.0228265	0.168964	0.110771	0.0390241	0.17502	0.123679	0.0445535	0.189596	0.160035	0.0673561	0.124954	0.119465	0.0536609	0.0938779	0.114924	0.0632981	0.0371933	0.0549292	0.0305395	0.0192241	0.0411723	0.0297017	0.0222665	0.0468471	0.0955925	0.131523	0.199475	0.178862	0.178125	0.0772953	0.0496683	0.0105974	0.00974839	0.0187211	0.0416713	0.0518426	0.0369112	0.0190676	0.0372184	0.0470944	0
74	4802.64	78	61.5724	M	Active	25	0.333515	0.255429	0.0690261	0.572809	0.516272	0.171678	0.639328	0.602227	0.214251	0.738841	0.868791	0.414609	0.484104	0.628684	0.300945	0.335872	0.638283	0.42014	0.078714	0.24905	0.145603	0.0187293	0.17313	0.175824	0	0.00950254	0.0604196	0.129873	0.245216	0.245023	0.230479	0.0680088	0.0114779	0	0	0.193747	0.388111	0.472802	0.199155	0.173535	0.330576	0.419375	0
75	8201.29	63.5029	129.148	F	Active	27	0.0455094	0.0226849	0.00697073	0.092703	0.0548934	0.017292	0.0743053	0.0451586	0.0141611	0.10844	0.0808476	0.0325402	0.0441455	0.0377666	0.0152351	0.0467118	0.0489639	0.0260982	0.00757253	0.0114289	0.00565952	0.00634732	0.013552	0.00981459	0.0138522	0.025178	0.0963794	0.107754	0.23707	0.161123	0.233536	0.0583838	0.0509304	0.00661123	0.00918247	0.0051078	0.0115961	0.0160377	0.00993071	0.00575253	0.00942605	0.0141943	0.00921911
76	3555.27	97	36.6522	M	Inactive	25	0.136312	0.0551088	0.00658224	0.211624	0.106848	0.0189438	0.203608	0.114207	0.02229	0.225537	0.157037	0.0432989	0.133289	0.105868	0.0286382	0.119504	0.116916	0.0438697	0.0290494	0.0389987	0.012159	0.021428	0.0535206	0.0297808	0.0360285	0.0664023	0.126465	0.159548	0.202231	0.171459	0.148719	0.0661048	0.0172132	0.00386217	0.00196694	0.0171313	0.0244069	0.0241724	0.00880758	0.0276443	0.0181236	0.0174108	0
77	3999.43	75.2963	53.1159	M	Active	31	0.168331	0.113287	0.0438579	0.256952	0.192495	0.0752162	0.250123	0.200933	0.0782474	0.286898	0.286484	0.132408	0.191288	0.209858	0.101589	0.158496	0.231836	0.139385	0.0551084	0.108977	0.065127	0.0262477	0.0935335	0.0783499	0.0519942	0.0654626	0.121746	0.143366	0.187114	0.164981	0.155551	0.0753292	0.0328809	0.00157441	0	0.0624127	0.110061	0.138876	0.0953436	0.0646553	0.0948969	0.123275	0
78	5449.36	74.8427	72.8109	M	Active	23	0.0608145	0.0305227	0.00733544	0.0978293	0.0566175	0.0171362	0.0920196	0.0573268	0.0175038	0.10367	0.0784249	0.0303873	0.054604	0.0463917	0.0178787	0.0469122	0.0449384	0.0210273	0.00920421	0.0124562	0.00510933	0.0184318	0.0175839	0.00644217	0.0144795	0.0333085	0.0879641	0.119384	0.197322	0.161669	0.181409	0.0564646	0.0820008	0.0061017	0.0598966	0.00873099	0.0185842	0.0184133	0.019029	0.016798	0.0116859	0.0131365	0
79	3701.44	82	45.1395	M	Active	25	0.0676632	0.0299652	0.00890352	0.111328	0.0551716	0.0150579	0.104751	0.0550969	0.0147098	0.133454	0.0850466	0.0268648	0.0804981	0.0575414	0.0184377	0.0803788	0.0717144	0.0281904	0.0283512	0.0299935	0.0113926	0.0228561	0.0415431	0.0196478	0.0308356	0.0482914	0.0998532	0.12197	0.192933	0.159077	0.176923	0.0744603	0.0551158	0.0200037	0.0205382	0.00784655	0.01382	0.0156863	0.0103922	0.00827178	0.0121925	0.0139273	0
80	5724.27	81.6466	70.1104	F	Active	24	0.212039	0.133345	0.0374973	0.365909	0.30135	0.100761	0.3302	0.274797	0.0934371	0.400091	0.444975	0.208502	0.2202	0.251187	0.111594	0.176173	0.283903	0.179483	0.0519627	0.096299	0.0516924	0.0255745	0.0773658	0.0655956	0.0219434	0.0507203	0.119066	0.149041	0.211039	0.176329	0.166852	0.0706356	0.0316787	0.00166596	0.00102914	0.0235804	0.0616079	0.0649662	0.0122814	0.0330972	0.0669449	0.0640987	0
81	12359.1	97.5223	126.731	M	Active	26	0.207212	0.121851	0.0294125	0.307744	0.221024	0.069741	0.322852	0.253084	0.0853388	0.333336	0.329774	0.142077	0.218778	0.239789	0.111049	0.150287	0.216443	0.13599	0.0642868	0.100992	0.0658116	0.0323411	0.070285	0.0622089	0.0260476	0.059396	0.1095	0.148429	0.190125	0.178408	0.151017	0.0816618	0.0410458	0.00949093	0.00487897	0.0204103	0.0331368	0.0446434	0.0186377	0.0210277	0.0336024	0.0429489	0
[truncated: 168 more columns]
